# Supplementary material for: Development of Chitosan Films from Edible Crickets and Their Performance as a Bio-Based Food Packaging Material
Source: MDPI journal article supplement (doi:10.3390/polysaccharides2040045), 2021-10-01
Supplement: s1 [file s1]

Supplementary Material

# Development of Chitosan Films from Edible Crickets and its Performance as a Bio-based Food Packaging Material

Morgan Malm <sup>1</sup>, Andrea M. Liceaga <sup>1,\*</sup>, Fernanda San Martin-Gonzalez <sup>1</sup>, Owen G. Jones <sup>1</sup>, Jose M. Garcia-Bravo <sup>2</sup> and Ian Kaplan <sup>3</sup>

<sup>1</sup> Department of Food Science, Purdue University, 745 Agriculture Mall Dr., West Lafayette, IN 47907, USA; mmeiser@purdue.edu (M.M.); msanmart@purdue.edu (F.S.M.); joneso@purdue.edu (O.J.)

<sup>2</sup> School of Engineering Technology, Purdue University, 401 N. Grant St., West Lafayette, IN 47907, USA; jmgarcia@purdue.edu

<sup>3</sup> Department of Entomology, Purdue University, 901 W. State St., West Lafayette, IN 47907, USA; ikaplan@purdue.edu

\* Correspondence: aliciega@purdue.edu; Tel.: +1-765-496-2460

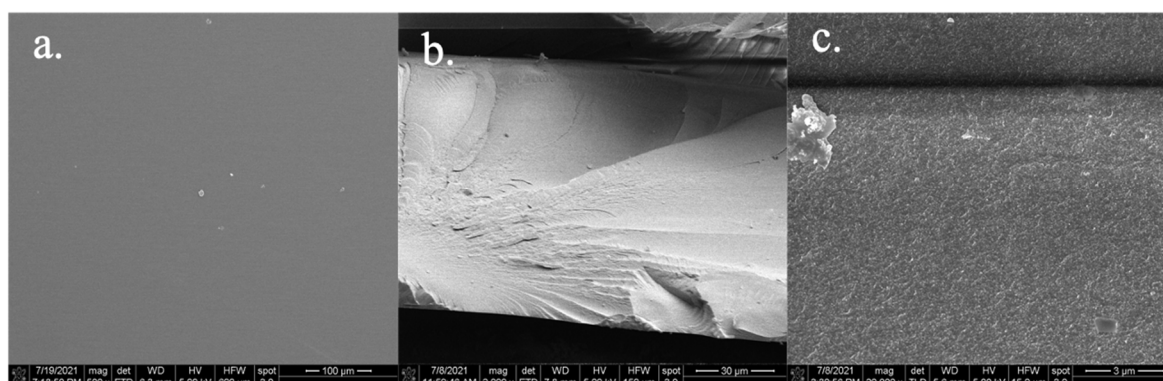

**Figure S1.** Commercial shrimp chitosan film surface (a) at 500x, and cross sections at 2,000x (b) and 20,000x (c) magnification.

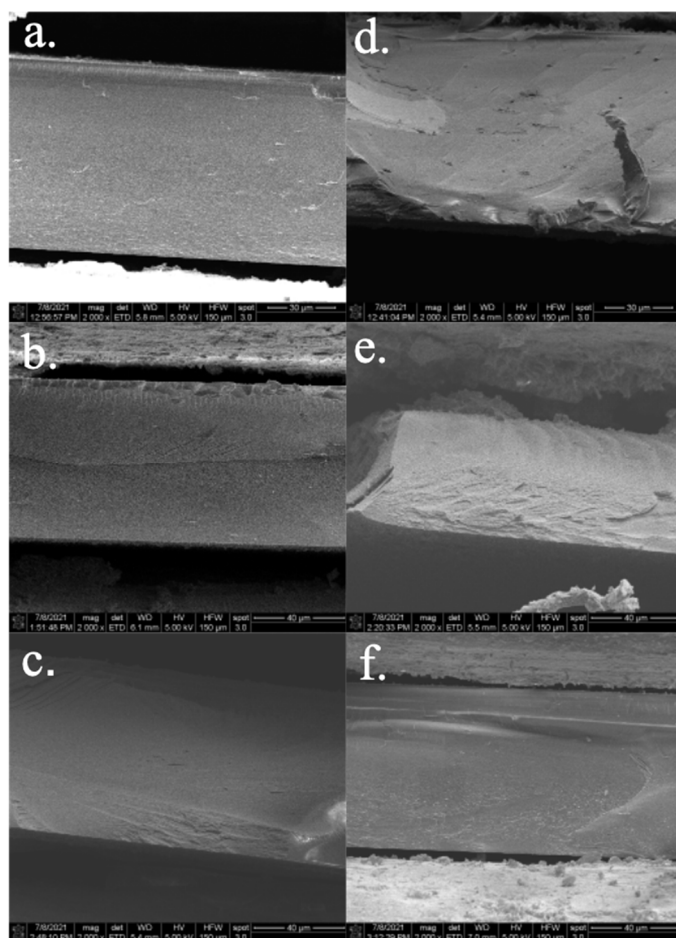

**Figure S2.** Cross-sections of chitosan films derived from crickets, *A. domesticus* (a-c) and *G. sigillatus* (d-f), shown at 2,000x magnification. Chitosan films have varying degrees of deacetylation, including 72% (a and d), 76% (b and e), and 80% (c and f).
